# Supplementary material for: Activated nanoporous carbon–gold nanoparticle composite electrode with enhanced volumetric capacitance
Source: Royal Society of Chemistry journal article supplement (doi:10.1039/c5ra14543k), 2015-01-01
Supplement: c5ra14543k1.pdf [file c5ra14543k1.pdf]

## Electronic Supplementary Information for

### Activated Nanoporous Carbon-Gold Nanoparticle Composite Electrode with Enhanced Volumetric Capacitance

David Avila-Brandea<sup>a,\*</sup>, Daniel Arenas-Esteban<sup>a</sup>, L. Carlos Otero-Díaz<sup>a</sup>, Andrés Guerrero-Martínez<sup>b</sup>, Gloria Tardajos<sup>b</sup>, Javier Carretero-González<sup>c,\*</sup>

<sup>a</sup>Department of Inorganic Chemistry, Faculty of Chemistry, Universidad Complutense de Madrid, E-28040, Madrid, Spain.

<sup>b</sup>Department of Physical Chemistry, Faculty of Chemistry, Universidad Complutense de Madrid, E-28040, Madrid, Spain.

<sup>c</sup>Polymer Ionics Research Group, Department of Inorganic Chemistry and Solid State Technology, Chemical Faculty, Warsaw University of Technology, Noakowskiego 3, PL-00664 Warsaw, Poland

\*Corresponding authors: David Ávila-Brandea ([davilabr@quim.ucm.es](mailto:davilabr@quim.ucm.es)) and Javier Carretero-González ([jabenzo@hotmail.com](mailto:jabenzo@hotmail.com)).

#### Supplementary results

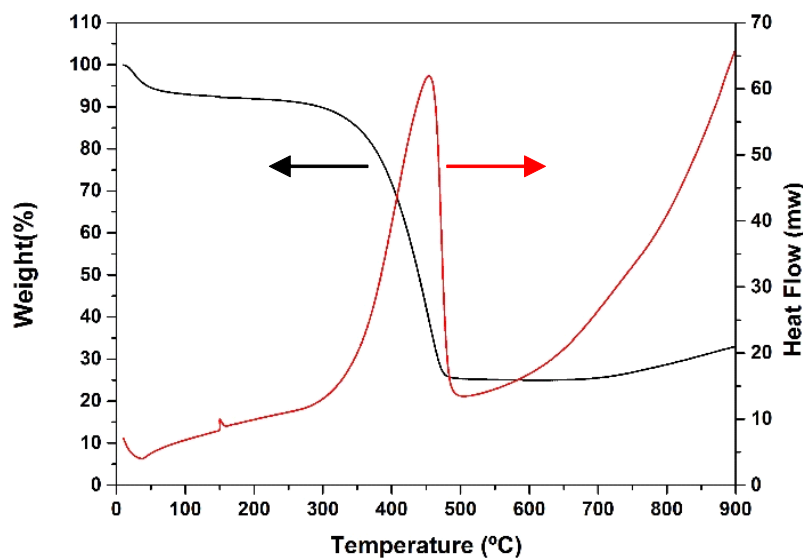

**Figure S11** Thermo-gravimetric analysis (TGA, black) and the differential temperature curve (DTG, red) of CAC-AuNPs

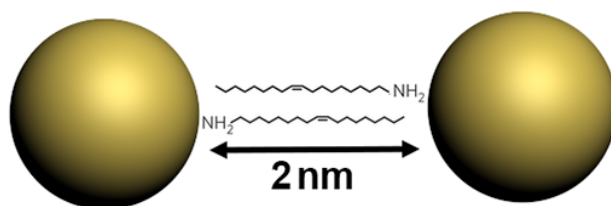

**Figure S12** Schematic diagram of two AuNPs in which an interdigitated bilayer of oleylamine separates adjacent nanocrystals.

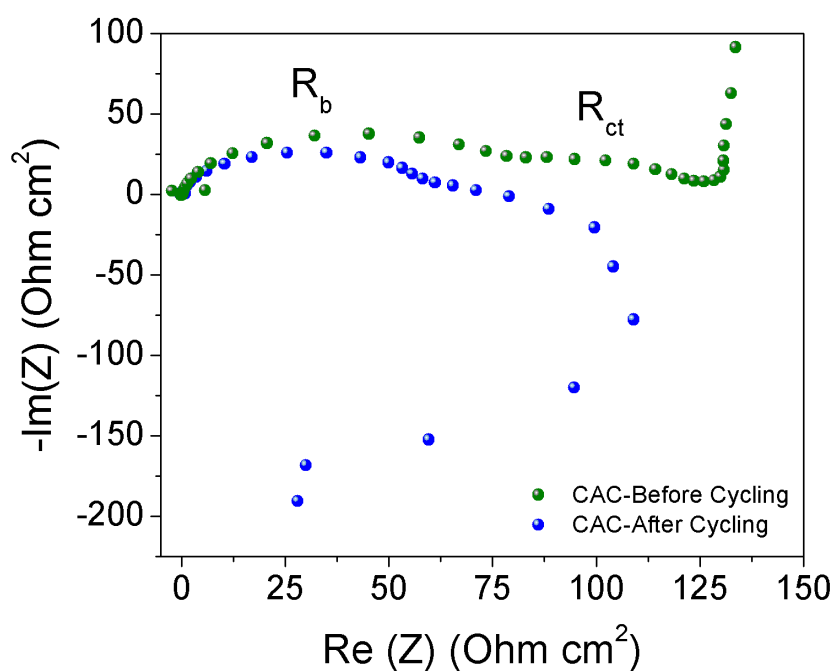

**Figure S13** Pulsed Electrochemical Impedance Spectroscopy (PEIS) for the symmetric supercapacitor cell made with CAC nanoporous carbon electrodes.

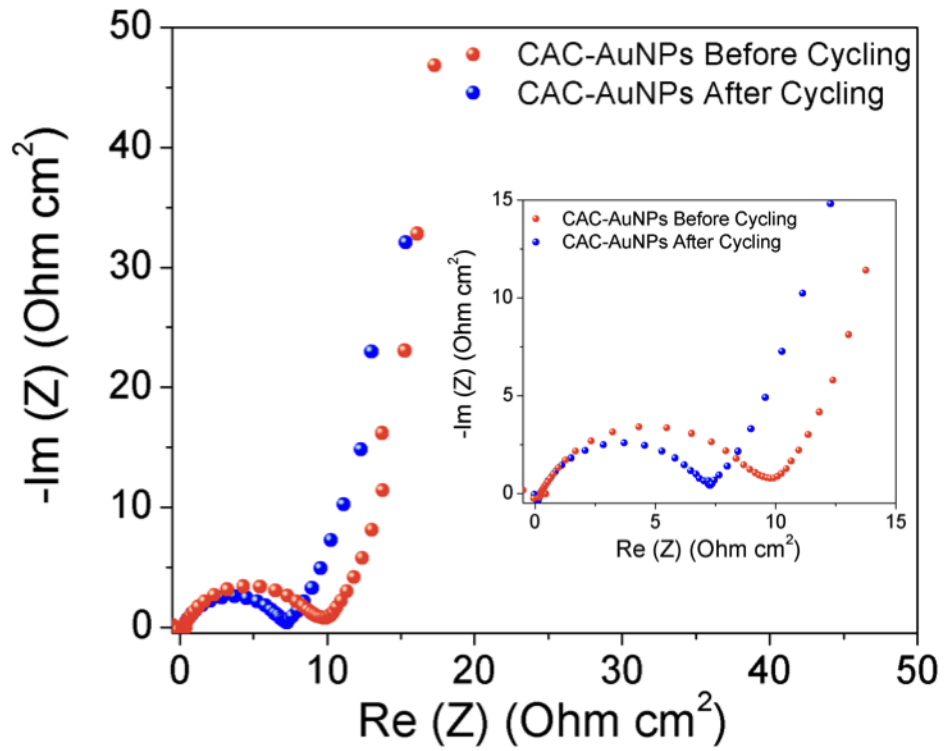

**Figure S14** Pulsed Electrochemical Impedance Spectroscopy (PEIS) for the symmetric supercapacitor cell made with nanoporous carbon CAC-Gold Nanoparticles electrodes before and after cycling.
